# Supplementary material for: Urinary Fatty Acid Binding Protein 3 Has Prognostic Value in Peripheral Artery Disease
Source: PubMed Central journal article supplement (PMC9250966; doi:10.3389/fcvm.2022.875244), 2022-06-20
Supplement: Table_1.pdf [file Table_1.pdf]

**Supplemental Table 1: Subgroup analysis of event rates based on PAD severity**

| <b>ABI</b>                              | <b>≥ 0.90<br/>[no PAD]<br/>(n=72)</b> | <b>0.89 – 0.75<br/>[mild PAD]<br/>(n=36)</b> | <b>0.74 – 0.50<br/>[moderate PAD]<br/>(n=76)</b> | <b>&lt; 0.50<br/>[severe PAD]<br/>(n=30)</b> |
|-----------------------------------------|---------------------------------------|----------------------------------------------|--------------------------------------------------|----------------------------------------------|
| <b>MALE<br/>(n=21)</b>                  | 0                                     | 6 (29)                                       | 13 (62)                                          | 2 (10)                                       |
| <b>Vascular intervention<br/>(n=18)</b> | 0                                     | 7 (39)                                       | 9 (50)                                           | 2 (11)                                       |
| <b>Major amputation<br/>(n=3)</b>       | 0                                     | 1 (33)                                       | 1 (33)                                           | 1 (33)                                       |
| <b>Worsening PAD status<br/>(n=28)</b>  | 0                                     | 13 (46)                                      | 15 (54)                                          | 0                                            |

\*Results reported as N (%)

Abbreviations: ABI (ankle brachial index), PAD (peripheral artery disease), MALE (major adverse limb event)
